# Supplementary material
Source: Springer Nature journal article supplement (https://www.springermedizin.de/resource/supplementary/12985_2013_2227_MOESM5_ESM.pdf/9606282)
Supplement: MOESM5 [file 9606282]

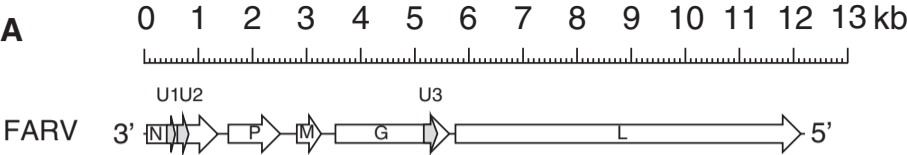

**B**

| Coding region | ORFs    | Lengths (nt) | Transcriptional regulatory sequences |                                |
|---------------|---------|--------------|--------------------------------------|--------------------------------|
|               |         |              | TI <sup>a</sup>                      | TTP <sup>b</sup>               |
| 1             | N/U1/U2 | 1236/183/255 | <u>UCUGG</u>                         | <u>CUAAUUG</u> <u>UUUUUUGG</u> |
| 2             | P       | 948          | <u>UCUGG</u>                         | <u>CUAAUUC</u> <u>UUUUUUGG</u> |
| 3             | M       | 444          | <u>UCUGG</u>                         | <u>CUAAUUG</u> <u>UUUUUUGG</u> |
| 4             | G/U3    | 2112/222     | <u>UCUGA</u>                         | <u>CUAAUUC</u> <u>UUUUUUGG</u> |
| 5             | L       | 6387         | <u>UCUGG</u>                         | ??                             |

<sup>a</sup> TI– transcription initiation sequence

<sup>b</sup> TTP–transcription termination/polyadenylation sequence
